# Supplementary material for: The synthesis of two-dimensional MoS2 nanosheets with enhanced tribological properties as oil additives
Source: Royal Society of Chemistry journal article supplement (doi:10.1039/c7ra12897e), 2018-01-01
Supplement: c7ra12897e1.pdf [file c7ra12897e1.pdf]

## Electronic Supplementary Information

# **The synthesis of two-dimensional MoS<sub>2</sub> nanosheets for enhanced tribological property as oil additives**

Meirong Yi, Chenhui Zhang\*

State Key Laboratory of Tribology, Tsinghua University, Beijing 100084, China

\*Corresponding author: Chenhui Zhang

Email: [chzhang@tsinghua.edu.cn](mailto:chzhang@tsinghua.edu.cn)

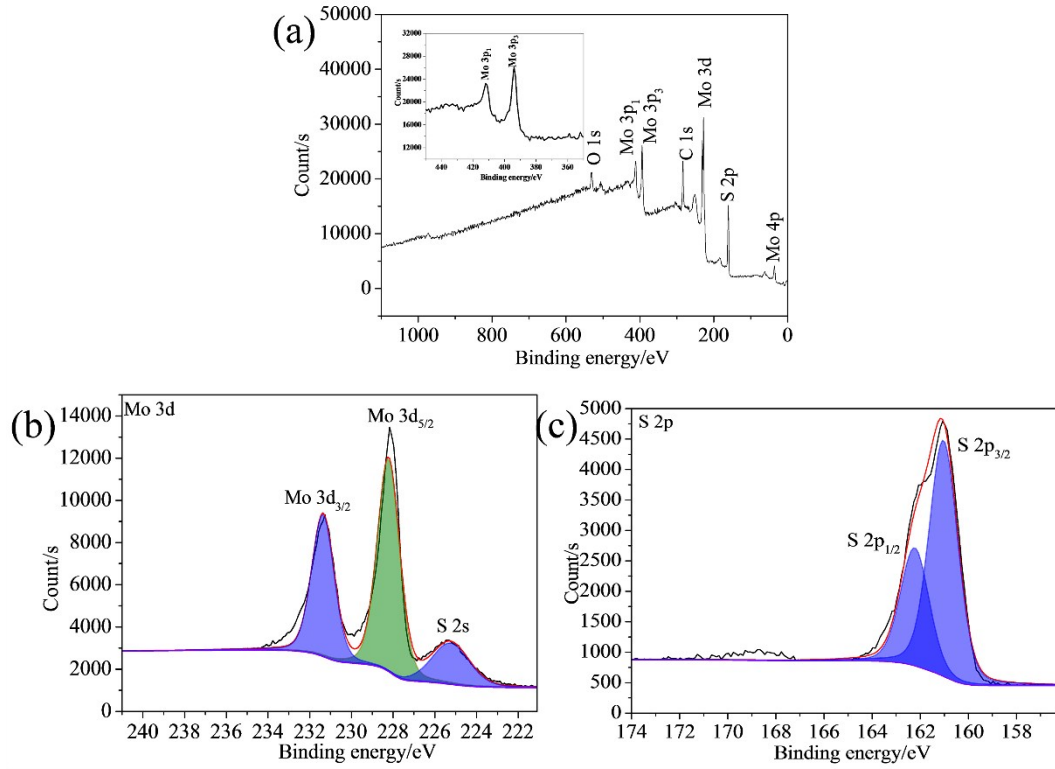

Fig. S1 (a) XPS survey spectrum and high-resolution XPS spectra of (b) Mo 3d; (c) S 2p for the synthesized ML MoS<sub>2</sub>

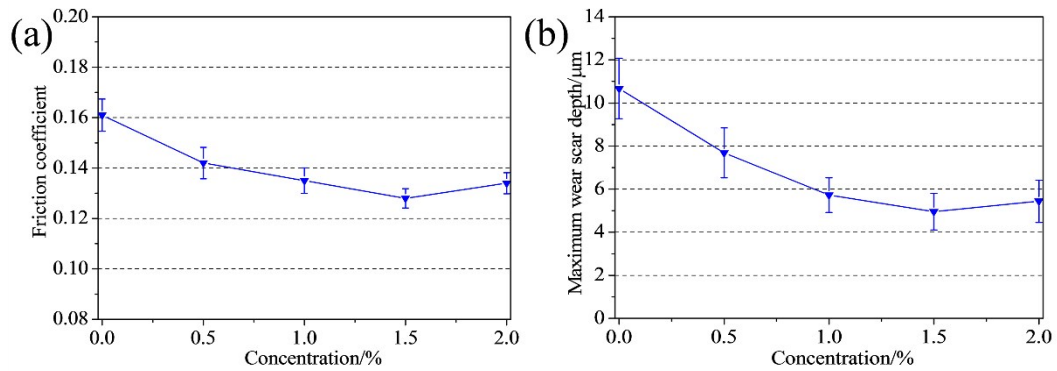

Fig. S2 (a) Friction coefficients and (b) maximum wear scar depth as functions of the ML MoS<sub>2</sub> concentration in oils

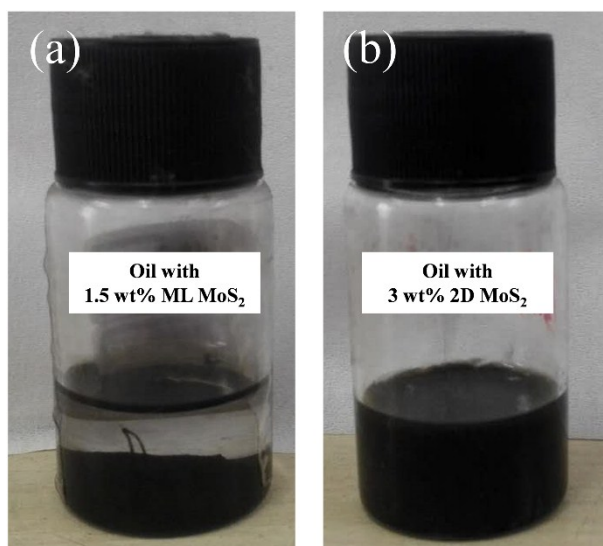

Fig. S3 Photos of the oils after standing 7 days

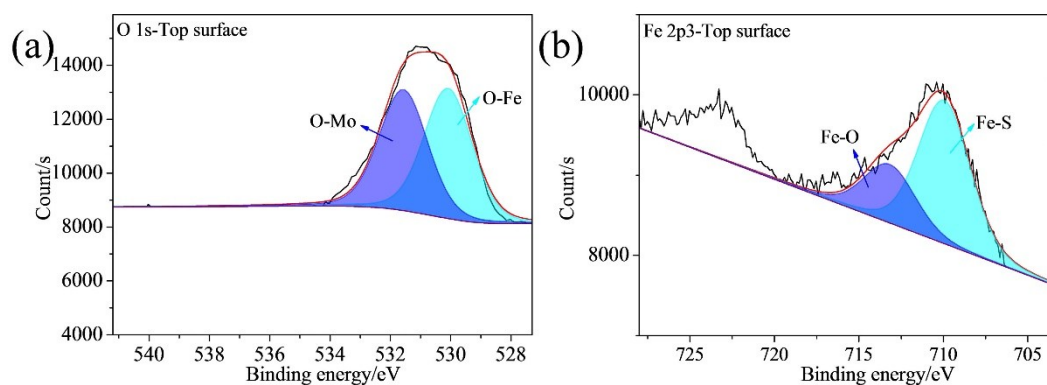

Fig. S4 XPS spectra of (a) O 1s and (b) Fe 2p3

for the wear track lubricated with the 2D MoS<sub>2</sub>

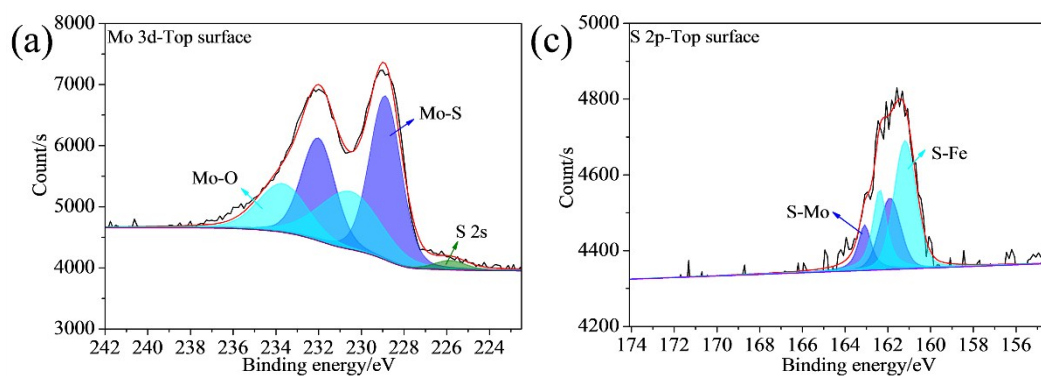

Fig. S5 XPS spectra of (a) Mo 3d and (b) S 2p for the wear track lubricated with the ML MoS<sub>2</sub>

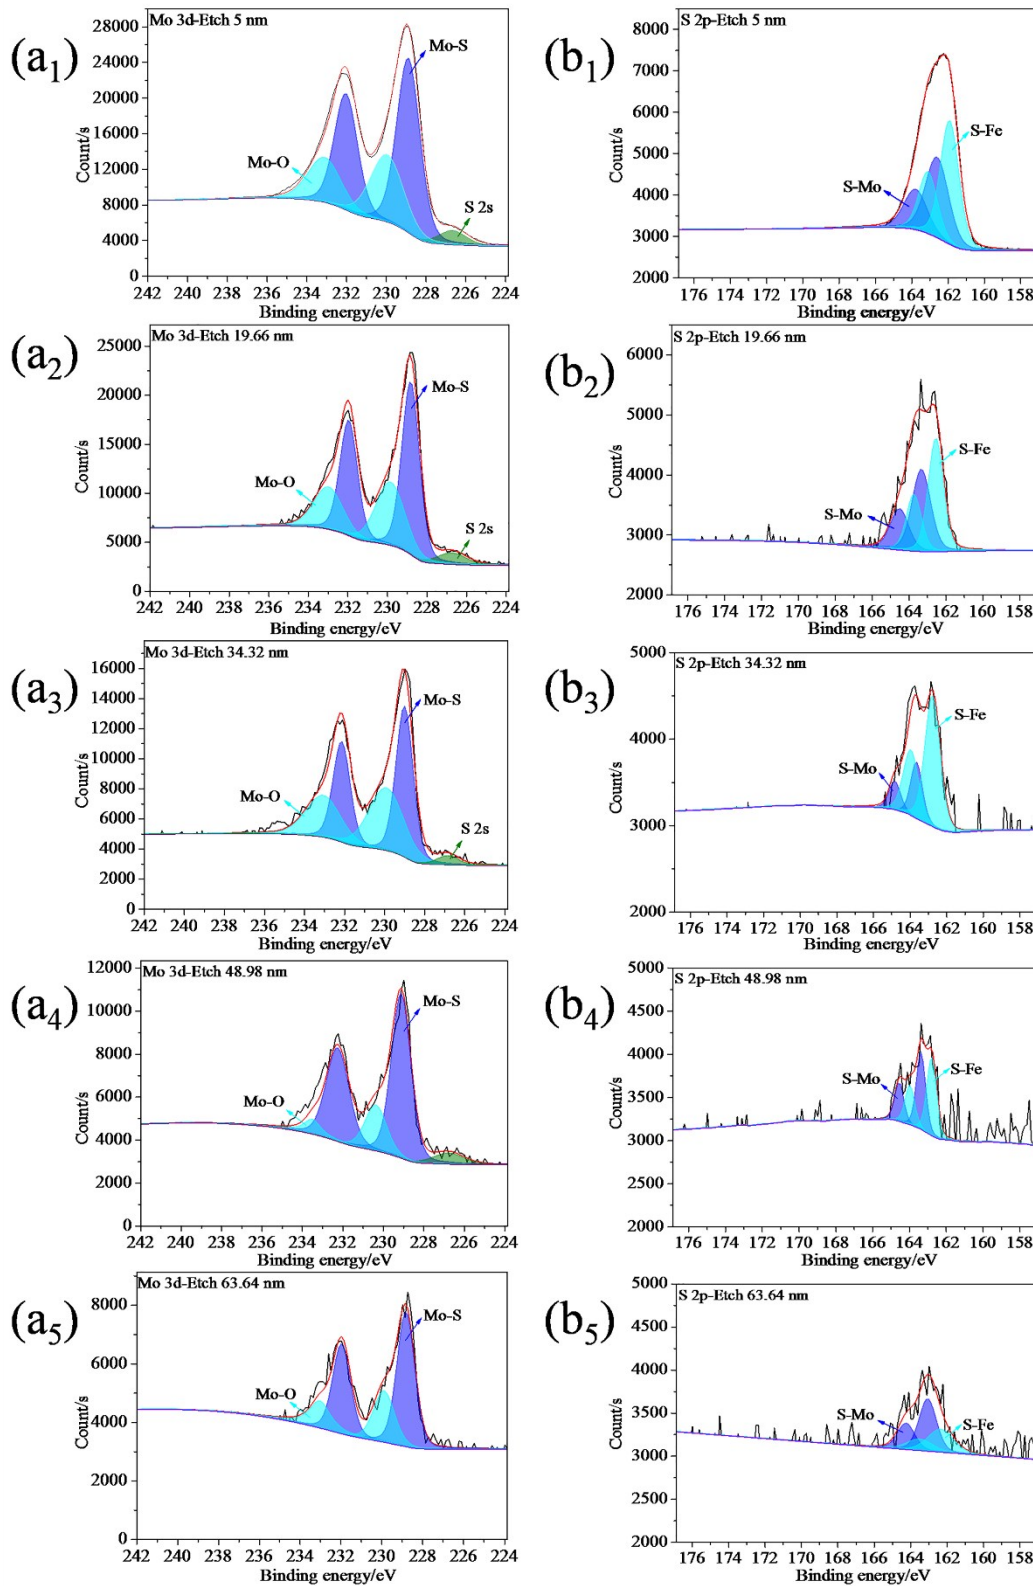

Fig. S6 XPS spectra of (a) Mo 3d and (b) S 2p with etching depth for the wear track lubricated with the 2D MoS<sub>2</sub>
